# Supplementary material for: Evaluation and Driving Forces of Ecosystem Service Change in Maqu Alpine Wetland: An Emergy Approach
Source: MDPI journal article supplement (doi:10.3390/land13030366), 2024-03-14
Supplement: s1 [file s1]

## Supplementary data

**Text S1.** The formula of emergy accounting method.

### Provisioning Services

Considering that the alpine wetland of Maqu can provide human with livestock products such as yak, sheep, milk and wool products, while the unique hydrological conditions and environment of the wetland can provide a large amount of pasture as feed for yak and sheep, in this way, the livestock product production and raw material production is selected as provisioning services.

(1) Livestock product production: The Maqu wetland ecosystem can provide various livestock products for human beings. In this paper, the quantity of yak and sheep and the output of milk and wool in Maqu County were selected as the ESV accounting of livestock products.

The calculation formula is as follows:

$$E_{map} = \sum_{n=1}^n (B_i \times UEV_{mapj}) \quad S1$$

Where  $E_{map}$  represents the emergy value (*sej*) corresponding to livestock production services in the wetland ecosystem;  $B_i$  represents the production of the *i*th livestock product,  $UEV_{mapj}$  represents the transformity corresponding to the *i*-th livestock product (*sej/unit*).

(2) Raw material production: The grazing production in Maqu County is selected to account for the value of raw material production services, calculated as follows:

$$E_{mgp} = G \times S \times UEV_{grass} \quad S2$$

Where  $E_{mgp}$  represents the emergy value corresponding to the raw material production service of wetland ecosystem (*sej*);  $G$  represents the grass yield per unit area of wetland (*kg*),  $S$  represents the area of wetland ( $m^2$ ),  $UEV_{grass}$  represents the per unit emergy of grass (*sej/kg*).

### Regulating Services

The special hydrological cycle of wetlands can make the wetland ecosystem have good water-saving ability. It can not only be used as a water source for agriculture, industry and urban life, but also can supply groundwater and surface water. Wetland plants have the function of carbon fixation and water purification. In this paper, water conservation, climate regulation, carbon sequestration and water purification were selected as the final regulating

services.

- (1) Water conservation: The sum of groundwater and surface water recharge of wetland ecosystem is selected to calculate the service value of water conservation, and the calculation formula is as follows:

$$E_{mwc} = \sum (R \times \rho \times S \times k \times UEV_{mgw})(H \times \rho \times UEV_w) \quad S3$$

Among them,  $E_{mwc}$  represents the emergy value (*sej*) corresponding to water conservation service.  $\rho$  represents the density of water ( $kg/m^3$ );  $UEV_w$  represents the per unit emergy of wetland water supply (*sej/kg*);  $R$  represents annual precipitation in the study area ( $m$ );  $S$  represents the wetland area of the study area ( $m^2$ );  $K$  represents the groundwater infiltration coefficient of the wetland ecosystem;  $UEV_{mgw}$  represents the emergy transformity of groundwater (*sej/g*);  $H$  represents the runoff difference of the Yellow River between Maqu's entry and exit ( $m^3$ ).

- (2) Climate regulation: There is a large amount of evaporation of water in wetland ecosystem every year, which can reduce temperature and increase humidity. The specific calculation formula is as follows:

$$E_{me} = E \times S \times \rho \times UEV_{vv} \quad S4$$

Where  $E_{me}$  represents the emergy value (*sej*) of the function of the climate regulating service.  $E$  represents the average annual evaporation of wetlands in the research area ( $m$ );  $S$  represents the wetland area of the study area ( $m^2$ );  $\rho$  represents the density of water ( $kg/m^3$ );  $UEV_{vv}$  represents the per unit emergy of water vapor (*sej/g*).

- (3) Water purification: considering that wetland vegetation can absorb pollutants in water and has a certain purification effect on water, the absorption effect of typical wetland vegetation on water pollutants is used to calculate the water purification. The formula is as follows:

$$E_{mwp} = \sum_{n=1}^n (A_{ij} \times Z_i \times S_i \times UEV_{mwpj}) \quad S5$$

Where  $E_{mwp}$  represents the emergy value (*sej*) corresponding to the water purification.  $A_{ij}$  represents the absorption capacity of the  $i$ -th wetland vegetation to the  $j$ -th water pollutant ( $g/kg$ );  $Z_i$  stands for fresh weight ( $kg/m^2$ ) per square meter of

wetland vegetation of type  $i$ ;  $S_i$  represents the area covered by the vegetation of the  $i$ -th wetland ( $m^2$ );  $UEV_{mwpj}$  represents the per unit emergy of the  $j$ -th pollutant ( $sej/g$ ).

- (4) Carbon sequestration: as a terrestrial carbon sink, wetland ecosystem can play a role in carbon sequestration. The calculation formula is as follows:

$$E_{mcs} = C \times S \times UEV_{Bio} \quad S6$$

Where  $E_{mcs}$  represents the emergy value ( $sej$ ) corresponding to the carbon sequestration.  $C$  represents the annual carbon sequestration per unit area of wetland ( $g/m^2/yr$ );  $S$  stands for wetland ecosystem area ( $m^2$ );  $UEV_{Bio}$  represents the emergy transformity of carbon sequestration ( $sej/g$ ).

- (5) Oxygen release: Wetland vegetation can release oxygen through photosynthesis. In this paper, oxygen release of wetland vegetation is used to calculate the value of oxygen release service. The calculation formula is as follows:

$$E_{mor} = O \times S \times L \times UEV_{Bio} \quad S7$$

Where  $E_{mor}$  represents the emergy value ( $sej$ ) corresponding to the oxygen release service function of wetland ecosystem.  $O$  represents annual dry matter yield per unit area of wetland ecosystem in the study area ( $kg/m^2$ );  $S$  represents the area of wetland ecosystem ( $m^2$ );  $L$  represents the amount of oxygen released by photosynthesis per kilogram of dry matter ( $kg$ );  $UEV_{Bio}$  represents the emergy conversion rate corresponding to the release of oxygen by wetland vegetation.

## Culture Services

Considering that wetland ecosystem can provide wetland landscape, attracting tourists and scientific research, we select scientific research and recreation as cultural services.

- (1) Recreation: The calculation formula is as follows:

$$E_{mt} = I_t \times S \times E_m R \quad S8$$

Where  $E_{mt}$  represents the emergy ( $sej$ ) corresponding to the leisure and entertainment value of the wetland ecosystem.  $I_t$  represents the tourism income of wetland ecosystem per unit area (dollar/ $m^2$ );  $S$  stands for wetland ecosystem area ( $m^2$ );  $E_m R$  represents the local emergy currency ratio ( $sej/dollar$ ) for the current year.

- (2) Scientific research: Due to the availability of data, this paper calculated the value of scientific research culture service by referring to the average scientific research value of

ecosystem per unit area in China. The calculation formula is as follows:

$$E_{ms} = Y_s \times S \times E_m R \quad S9$$

Where  $E_{ms}$  represents the emergy (sej) corresponding to the scientific research and cultural service value of wetland ecosystem.  $Y_s$  represents the average scientific research value of wetlands per unit area in China (dollar/ $m^2$ );  $S$  stands for wetland ecosystem area ( $m^2$ );  $E_m R$  represents the local emergy currency ratio of the year (sej/dollar).

**Table S1.** The data sources of this article.

| Data Types                                                                           | Data Sources                                                                               |
|--------------------------------------------------------------------------------------|--------------------------------------------------------------------------------------------|
| (1) Remote sensing images of Maqu County                                             | Geospatial Data Cloud<br>( <a href="https://www.gscloud.cn/">https://www.gscloud.cn/</a> ) |
| (2) Physical quantity data                                                           |                                                                                            |
| ①Renewable resources: sunshine hours, wind speed, precipitation, etc.                | Statistical Yearbook of Gannan Prefecture 1990-2020                                        |
| ②Renewable resource factors: eddy diffusion coefficients, wind speed gradients, etc. | Odum [1], Lan et al. [2], Zhu [3]                                                          |
| ③Yak and sheep slaughter, wool and milk production                                   | 1990-2004 Maqu County Annals; Statistical Yearbook of Gannan Prefecture 1990-2020          |
| ④Surface runoff, exit and entry runoff                                               | Gansu Yearbook 2000 and 2005; 2006; Gansu Water Resources Bulletin 2000-2010               |
| ⑤Water purification                                                                  | Li [4], Zhao et al [5]                                                                     |
| ⑦Annual evaporation                                                                  | Maqu County Meteorological Bureau                                                          |
| ⑧Wetland carbon sequestration per unit area                                          | Piao et al [6]                                                                             |
| ⑨Tourism income per unit area of wetland and scientific research value               | Xie et al [7]                                                                              |

**Table S2.** The emergy analysis table of valuation on wetland ecosystem services in 1990 in Maqu County.

| Items                        | Raw data | unit | UEV<br>(sej·unit·1) <sup>1</sup> | Sources               | Total emergy<br>(sej·a·1) |
|------------------------------|----------|------|----------------------------------|-----------------------|---------------------------|
| <i>Renewable Resource</i>    |          |      |                                  |                       |                           |
| Sunlight                     | 1.05E+19 | J    | 1                                | Brown and Ulgiati [8] | 1.05E+19                  |
| Deep heat                    | 1.10E+15 | J    | 4.90E+03                         | Brown and Ulgiati [8] | 5.41E+18                  |
| Wind                         | 7.24E+10 | J    | 8.00E+02                         | Brown and Ulgiati [8] | 5.79E+13                  |
| Rain (geo potential)         | 1.75E+16 | J    | 1.05E+04                         | Brown and Ulgiati [8] | 1.84E+20                  |
| Rain (chemical)              | 2.52E+15 | J    | 7.00E+03                         | Brown and Ulgiati [8] | 1.76E+19                  |
| Runoff (geo potential)       | 6.15E+16 | J    | 1.28E+04                         | Brown and Ulgiati [8] | 7.87E+20                  |
| Runoff (chemical)            | 1.30E+15 | J    | 2.13E+04                         | Brown and Ulgiati [8] | 2.77E+19                  |
| <i>Provisioning Services</i> |          |      |                                  |                       |                           |

|                                 |                  |      |                  |                        |          |
|---------------------------------|------------------|------|------------------|------------------------|----------|
| Livestock production            | 4.95E+10         | g    | Calculated by Eq | Zhu [3]                | 1.56E+14 |
| Raw material production         | 7.65E+11         | g    | 2.70E+04         | Dong et al [9]         | 2.07E+16 |
| <i>Regulating Services</i>      |                  |      |                  |                        |          |
| Water conservation <sup>2</sup> | 2.24E+15         | g    | Calculated by Eq | Zhu [3]                | 1.57E+19 |
| Water purification <sup>3</sup> | 3.76E+07         | g    | Calculated by Eq | Dong [9]               | 3.69E+17 |
| Climate regulation              | 1.33E+12         | g    | 5.15E+05         | Odum [1]               | 6.85E+17 |
| Carbon sequestration            | 3.09E+09         | g    | 4.58E+03         | Brown and Ulgiati [10] | 1.41E+13 |
| Oxygen release                  | 5.59E+13         | g    | 4.58E+03         | Brown and Ulgiati [10] | 2.56E+17 |
| <i>Culture Services</i>         |                  |      |                  |                        |          |
| Recreation                      | Calculated by Eq | Yuan | Calculated by Eq | This article           | 2.69E+18 |
| Scientific research             | Calculated by Eq | Yuan | Calculated by Eq | This article           | 1.95E+18 |

<sup>1</sup>The value of livestock production services consists of four components: yak, sheep, milk and wool, and the transformity is 4.00E+06 (sej/unit), 2.00E+06 (sej/unit), 2.00E+06 (sej/unit) and 4.40E+06 (sej/unit), respectively.

<sup>2</sup> The service value of water conservation is composed of groundwater recharge and surface water recharge of wetland ecosystem, and the transformity is 2.23E+03 (sej/unit) and 7.01E+03 (sej/unit), respectively.

<sup>3</sup> The value of wetland water purification is calculated by formula, Considering the availability of data, only the absorption data of three common heavy metal pollutants, Cu, Zn and Pb, were selected to account for the value of water purification. The transformity of Cu, Zn and Pb were 6.80E+09 (sej/unit), 1.25E+10 (sej/unit) and 1.25E+10 (sej/unit).

**Table S3.** The emergy analysis table of valuation on wetland ecosystem services in 2000 in Maqu County.

| Items                           | Raw data | unit | UEV<br>(sej·unit <sup>-1</sup> ) <sup>1</sup> | Sources               | Total emergy<br>(sej·a <sup>-1</sup> ) |
|---------------------------------|----------|------|-----------------------------------------------|-----------------------|----------------------------------------|
| <i>Renewable Resource</i>       |          |      |                                               |                       |                                        |
| Sunlight                        | 1.09E+19 | J    | 1                                             | Brown and Ulgiati [8] | 1.09E+19                               |
| Deep heat                       | 1.09E+15 | J    | 4.90E+03                                      | Brown and Ulgiati [8] | 5.33E+18                               |
| Wind                            | 7.14E+10 | J    | 8.00E+02                                      | Brown and Ulgiati [8] | 5.71E+13                               |
| Rain (geo potential)            | 1.95E+16 | J    | 1.05E+04                                      | Brown and Ulgiati [8] | 2.04E+20                               |
| Rain (chemical)                 | 2.81E+15 | J    | 7.00E+03                                      | Brown and Ulgiati [8] | 1.96E+19                               |
| Runoff (geo potential)          | 3.32E+16 | J    | 1.28E+04                                      | Brown and Ulgiati [8] | 4.24E+20                               |
| Runoff (chemical)               | 7.02E+14 | J    | 2.13E+04                                      | Brown and Ulgiati [8] | 1.50E+19                               |
| <i>Provisioning Services</i>    |          |      |                                               |                       |                                        |
| Livestock production            | 1.24E+07 | g    | Calculated by Eq①                             | Zhu [3]               | 1.90E+14                               |
| Raw material production         | 7.54E+11 | g    | 2.70E+04                                      | Dong et al [9]        | 2.04E+16                               |
| <i>Regulating Services</i>      |          |      |                                               |                       |                                        |
| Water conservation <sup>2</sup> | 1.42E+15 | g    | Calculated by Eq③                             | Zhu [3]               | 9.97E+18                               |
| Water purification <sup>3</sup> | 3.71E+07 | g    | Calculated by Eq⑤                             | Dong et al [9]        | 3.64E+17                               |

|                         |                  |      |                   |                        |          |
|-------------------------|------------------|------|-------------------|------------------------|----------|
| Climate regulation      | 1.50E+12         | g    | 5.15E+05          | Odum [1]               | 7.70E+17 |
| Carbon sequestration    | 3.05E+09         | g    | 4.58E+03          | Brown and Ulgiati [10] | 1.40E+13 |
| Oxygen release          | 5.51E+13         | g    | 4.58E+03          | Brown and Ulgiati [10] | 2.52E+17 |
| <i>Culture Services</i> |                  |      |                   |                        |          |
| Recreation              | Calculated by Eq | Yuan | Calculated by Eq⑧ | This article           | 6.81E+17 |
| Scientific research     | Calculated by Eq | Yuan | Calculated by Eq⑨ | This article           | 4.93E+17 |

<sup>1</sup>The value of livestock production services consists of four components: yak, sheep, milk and wool, and the transformity is 4.00E+06 (sej/unit), 2.00E+06 (sej/unit), 2.00E+06 (sej/unit) and 4.40E+06 (sej/unit), respectively.

<sup>2</sup> The service value of water conservation is composed of groundwater recharge and surface water recharge of wetland ecosystem, and the transformity is 2.23E+03 (sej/unit) and 7.01E+03 (sej/unit), respectively.

<sup>3</sup> The value of wetland water purification is calculated by formula, Considering the availability of data, only the absorption data of three common heavy metal pollutants, Cu, Zn and Pb, were selected to account for the value of water purification. The transformity of Cu, Zn and Pb were 6.80E+09 (sej/unit), 1.25E+10 (sej/unit) and 1.25E+10 (sej/unit).

**Table S4.** The emergy analysis table of valuation on wetland ecosystem services in 2010 in Maqu County.

| Items                           | Raw data         | unit | UEV<br>(sej·unit <sup>-1</sup> ) <sup>1</sup> | Sources                | Total emergy<br>(sej·a <sup>-1</sup> ) |
|---------------------------------|------------------|------|-----------------------------------------------|------------------------|----------------------------------------|
| <i>Renewable Resource</i>       |                  |      |                                               |                        |                                        |
| Sunlight                        | 9.07E+18         | J    | 1                                             | Brown and Ulgiati [8]  | 9.07E+18                               |
| Deep heat                       | 1.07E+15         | J    | 4.90E+03                                      | Brown and Ulgiati [8]  | 5.26E+18                               |
| Wind                            | 7.05E+10         | J    | 8.00E+02                                      | Brown and Ulgiati [8]  | 5.64E+13                               |
| Rain (geo potential)            | 2.07E+16         | J    | 1.05E+04                                      | Brown and Ulgiati [8]  | 2.17E+20                               |
| Rain (chemical)                 | 2.98E+15         | J    | 7.00E+03                                      | Brown and Ulgiati [8]  | 2.09E+19                               |
| Runoff (geo potential)          | 5.08E+16         | J    | 1.28E+04                                      | Brown and Ulgiati [8]  | 6.50E+20                               |
| Runoff (chemical)               | 1.08E+15         | J    | 2.13E+04                                      | Brown and Ulgiati [8]  | 2.29E+19                               |
| <i>Provisioning Services</i>    |                  |      |                                               |                        |                                        |
| Livestock production            | 1.24E+07         | g    | Calculated by Eq①                             | Zhu [3]                | 3.26E+14                               |
| Raw material production         | 7.53E+11         | g    | 2.70E+04                                      | Dong et al [9]         | 2.03E+16                               |
| <i>Regulating Services</i>      |                  |      |                                               |                        |                                        |
| Water conservation <sup>2</sup> | 2.17E+15         | g    | Calculated by Eq③                             | Zhu [3]                | 1.52E+19                               |
| Water purification <sup>3</sup> | 3.65E+07         | g    | Calculated by Eq⑤                             | Dong et al [9]         | 3.58E+17                               |
| Climate regulation              | 1.43E+12         | g    | 5.15E+05                                      | Odum [1]               | 7.35E+17                               |
| Carbon sequestration            | 2.99E+09         | g    | 4.58E+03                                      | Brown and Ulgiati [10] | 1.37E+13                               |
| Oxygen release                  | 5.71E+13         | g    | 4.58E+03                                      | Brown and Ulgiati [10] | 2.62E+17                               |
| <i>Culture Services</i>         |                  |      |                                               |                        |                                        |
| Recreation                      | Calculated by Eq | Yuan | Calculated by Eq⑧                             | This article           | 5.13E+17                               |

<sup>1</sup>The value of livestock production services consists of four components: yak, sheep, milk and wool, and the transformity is 4.00E+06 (sej/unit), 2.00E+06 (sej/unit), 2.00E+06 (sej/unit) and 4.40E+06 (sej/unit), respectively.

<sup>2</sup> The service value of water conservation is composed of groundwater recharge and surface water recharge of wetland ecosystem, and the transformity is 2.23E+03 (sej/unit) and 7.01E+03 (sej/unit), respectively.

<sup>3</sup> The value of wetland water purification is calculated by formula, Considering the availability of data, only the absorption data of three common heavy metal pollutants, Cu, Zn and Pb, were selected to account for the value of water purification. The transformity of Cu, Zn and Pb were 6.80E+09 (sej/unit), 1.25E+10 (sej/unit) and 1.25E+10 (sej/unit).

## References

1. Odum. H.T. Environmental accounting: Emergy and environmental decision making. *Forest Science* 1997, 43(2), 305, doi: 10.2307/1127803.
2. Lan, S.F., Qin, P., Lu, H.F. *Emergy Synthesis of Ecological-economic Systems*, Beijing: Chemical Press, 2002.
3. Zhu, Y.L. *Study on Agro-ecosystem's Sustainable Development of Hunan Based on the Emergy Theory*. Central South University of Forestry and Technology, 2010.
4. Li, J. *Research on the Absorption of Heavy by Aquatic Plants in Different Nutritions*. Central South University of Forestry and Technology, 2008.
5. Zhao, Y.H., Jing, J.W., Wang, X.T., Yue, H.M., Niu, X.Y., Fang, J.P. Study on Heavy Metals Bioaccumulation Characteristics and Tolerance of Pioneer Plants from Central Tibet Mining Area. *Acta Agrestia Sinica* 2016, 24, (3), 598-603, doi: 10.11733/j.issn.1007-0435.2016.03.017.
6. Piao, S.L., Fang, J.Y., Ciais, P., Peylin, P., Huang, Y., Sitch, S., Wang, T. The carbon balance of terrestrial ecosystems in China. *Nature* 2010, 458, (7241), 1009-1013, doi: 10.3832/efor0584-006.
7. Xie, G.D., Lu, C.X., Leng, Y.F., Zheng, D., Li, S.C. Ecological assets valuation of the Tibetan Plateau. *Journal of Natural Resources* 2003, 18, (2), 189-196.
8. Brown, M.T., Ulgiati, S. Emergy assessment of global renewable sources. *Ecological Modelling* 2016, 339(10), 148, doi: 10.1016/j.ecolmodel.2016.03.010.
9. Dong, Y., Yang, L.Z., Zhang, Y.F., Dong, X.B. Analysis and Evaluation of Cropping-grazing System of Inner Mongolia Based on Emergy. *Ecological Industry Watch* 2008, 197(1), 171.
10. Brown, M.T., Ulgiati, S. *Environmental Accounting: coupling human and natural systems*. New York: Springer, 2018.
